# Supplementary material for: Mental Health Morbidities and Time to Cancer Diagnosis Among Adults With Colon Cancer in England
Source: PubMed Central journal article supplement (PMC9623442; doi:10.1001/jamanetworkopen.2022.38569), 2022-10-31
Supplement: jamanetwopen-e2238569-s001.pdf [file jamanetwopen-e2238569-s001.pdf]

## Supplemental Online Content

Benitez Majano S, Lyratzopoulos G, de Wit NJ, et al. Mental health morbidities and time to cancer diagnosis among adults with colon cancer in England. *JAMA Netw Open*. 2022;5(10):e2238569. doi:10.1001/jamanetworkopen.2022.38569

**eTable 1.** Symptom Code List

**eAppendix.** Routes to Diagnosis for Included Patients Who Were Symptomatic

**eFigure.** Study Variables and Hypothesized Associations Between Mental Health Morbidity and Symptomatic Presentations and Route to Cancer Diagnosis

**eTable 2.** Characteristics of 2115 Patients With Colon Cancer and Red-Flag Symptoms by Mental Health Morbidity (MHM) Status

**eTable 3.** Patients at Risk for Diagnosis and Investigation by Mental Health Morbidity (MHM) per Time Point Before Cancer Diagnosis

**eTable 4.** Likelihood of Being Diagnosed After Emergency Presentation (EP) in 2115 Patients With Red-Flag Symptoms

**eTable 5.** Likelihood of Being Diagnosed After Expedited Referral in Patients Aged 60 y and Older With Red-Flag Symptoms

**eTable 6.** Likelihood of Being Diagnosed After Emergency Presentation Among Patients With Colon Cancer Who Were Symptomatic

This supplemental material has been provided by the authors to give readers additional information about their work.

| <b>eTable 1. Symptom Code List</b> |                |                  |
|------------------------------------|----------------|------------------|
| <b>Symptom category</b>            | <b>Medcode</b> | <b>Readcodes</b> |
| abdominal pain                     | 11647          | 25C8.00          |
| abdominal pain                     | 3338           | R090z00          |
| abdominal pain                     | 6395           | 196..12          |
| abdominal pain                     | 6357           | 197..14          |
| abdominal pain                     | 8436           | R090H00          |
| abdominal pain                     | 2982           | 1978             |
| abdominal pain                     | 4617           | 1971             |
| abdominal pain                     | 7300           | 1979             |
| abdominal pain                     | 8362           | R090K00          |
| abdominal pain                     | 5960           | 197..13          |
| abdominal pain                     | 17223          | 25C..12          |
| abdominal pain                     | 19283          | R090N00          |
| abdominal pain                     | 22608          | 197C.00          |
| abdominal pain                     | 701            | 1975             |
| abdominal pain                     | 1976           | 196..11          |
| abdominal pain                     | 7490           | 197..11          |
| abdominal pain                     | 5782           | 25C..15          |
| abdominal pain                     | 716            | R090400          |
| abdominal pain                     | 1228           | 1829             |
| abdominal pain                     | 36558          | 25C5.00          |
| abdominal pain                     | 25630          | 25C7.00          |
| abdominal pain                     | 628            | R090700          |
| abdominal pain                     | 19020          | 25C..13          |
| abdominal pain                     | 29352          | 1969000          |
| abdominal pain                     | 1239           | R090200          |
| abdominal pain                     | 4771           | R090600          |
| abdominal pain                     | 177            | 1969             |
| abdominal pain                     | 17324          | 1DC5.00          |
| abdominal pain                     | 16868          | R090A00          |
| abdominal pain                     | 37101          | 25C4.00          |
| abdominal pain                     | 15288          | R090C00          |
| abdominal pain                     | 19360          | R090M00          |
| abdominal pain                     | 16402          | R090000          |
| abdominal pain                     | 16806          | R090900          |
| abdominal pain                     | 7726           | R090J00          |
| abdominal pain                     | 25118          | 197..00          |
| abdominal pain                     | 5691           | 1963             |
| abdominal pain                     | 34301          | 25D..00          |
| abdominal pain                     | 12639          | 25C2.00          |
| abdominal pain                     | 21583          | 25CA.00          |
| abdominal pain                     | 3086           | 1976             |
| abdominal pain                     | 24584          | 25D..11          |
| abdominal pain                     | 948            | R090F00          |
| abdominal pain                     | 24661          | 197A.00          |
| abdominal pain                     | 23872          | 1973             |
| abdominal pain                     | 5804           | 2118.12          |
| abdominal pain                     | 5899           | 1A53.12          |
| abdominal pain                     | 15213          | 2118.00          |
| abdominal pain                     | 15180          | 25C..00          |
| abdominal pain                     | 20475          | R090800          |
| abdominal pain                     | 11070          | 197A.11          |
| abdominal pain                     | 14916          | 25CZ.00          |
| abdominal pain                     | 290            | 1972             |
| abdominal pain                     | 3978           | 197B.00          |
| abdominal pain                     | 19223          | 25C3.00          |
| abdominal pain                     | 7812           | 1962             |
| abdominal pain                     | 2234           | R090E00          |

|                       |       |         |
|-----------------------|-------|---------|
| abdominal pain        | 421   | 197..12 |
| abdominal pain        | 1181  | 1977    |
| abdominal pain        | 13626 | 2I18100 |
| abdominal pain        | 542   | R090500 |
| abdominal pain        | 9695  | 197D.00 |
| abdominal pain        | 17636 | 25C..14 |
| abdominal pain        | 20640 | 25C..11 |
| abdominal pain        | 2383  | 1968    |
| abdominal pain        | 14989 | 196..00 |
| abdominal pain        | 42211 | 25C9.00 |
| abdominal pain        | 1763  | R090.00 |
| abdominal pain        | 2056  | R090100 |
| abdominal pain        | 3049  | J574700 |
| abdominal pain        | 1282  | A081000 |
| abdominal pain        | 7248  | R090G12 |
| abdominal pain        | 6717  | 14C4.00 |
| abdominal pain        | 2767  | J574800 |
| abdominal pain        | 1561  | J4...11 |
| abdominal pain        | 20391 | 12E2.00 |
| abdominal pain        | 23950 | J41..11 |
| bloating              | 29567 | 19A2.00 |
| bloating              | 5150  | R073400 |
| bloating              | 14880 | R073300 |
| bloating              | 6229  | 19A..00 |
| bloating              | 2657  | 19A3.00 |
| bloating              | 5821  | 19B..12 |
| bloating              | 41607 | 19AZ.00 |
| change in bowel habit | 16665 | R078.00 |
| change in bowel habit | 19690 | 19EA.11 |
| change in bowel habit | 910   | 19EA.00 |
| constipation          | 5803  | J520z00 |
| constipation          | 23641 | J520000 |
| constipation          | 1709  | J520.00 |
| constipation          | 6364  | J520100 |
| constipation          | 24180 | J520y00 |
| constipation          | 1028  | 19C..00 |
| constipation          | 99999 | J520400 |
| constipation          | 25797 | J520200 |
| constipation          | 26022 | J520300 |
| constipation          | 17652 | 19C2.00 |
| constipation          | 10687 | J503100 |
| constipation          | 2004  | 19C..11 |
| constipation          | 20450 | 19CZ.00 |
| diarrhoea             | 17017 | J4zz.11 |
| diarrhoea             | 14695 | 19FZ.00 |
| diarrhoea             | 48313 | A082z00 |
| diarrhoea             | 7644  | 19G..00 |
| diarrhoea             | 14881 | R077100 |
| diarrhoea             | 6685  | J43z.11 |
| diarrhoea             | 5090  | A083.00 |
| diarrhoea             | 6016  | J4...13 |
| diarrhoea             | 10158 | E264311 |
| diarrhoea             | 192   | 19F..11 |
| diarrhoea             | 2133  | A082000 |
| diarrhoea             | 53739 | A074011 |
| diarrhoea             | 5036  | J525.00 |
| diarrhoea             | 11155 | A082.11 |
| diarrhoea             | 4343  | 19F2.00 |
| diarrhoea             | 1695  | 19F..12 |
| diarrhoea             | 15371 | E264300 |

|               |       |         |
|---------------|-------|---------|
| diarrhoea     | 14665 | A083.11 |
| diarrhoea     | 5134  | 19F..00 |
| diarrhoea     | 29835 | J521000 |
| diarrhoea     | 2182  | 19FZ.11 |
| diarrhoea     | 4542  | A082.00 |
| diarrhoea     | 52750 | Ayu0H00 |
| diarrhoea     | 30321 | J4z..11 |
| diarrhoea     | 21294 | 19F3.00 |
| diarrhoea     | 8765  | 19F1.00 |
| diarrhoea     | 15289 | A076.11 |
| fatigue       | 5583  | R007000 |
| fatigue       | 9656  | R007211 |
| fatigue       | 1688  | R2y3.00 |
| fatigue       | 6190  | 168..11 |
| fatigue       | 15516 | Eu46000 |
| fatigue       | 16479 | 1684    |
| fatigue       | 1147  | R007500 |
| fatigue       | 2855  | E205.00 |
| fatigue       | 6242  | E205.12 |
| fatigue       | 9889  | 1683.11 |
| fatigue       | 5794  | R007z11 |
| fatigue       | 27877 | R007.00 |
| fatigue       | 7235  | F286.11 |
| fatigue       | 1371  | R007300 |
| fatigue       | 5751  | 168..00 |
| fatigue       | 6029  | F286.12 |
| fatigue       | 7529  | F286.14 |
| fatigue       | 1582  | R007100 |
| fatigue       | 3361  | F286.00 |
| fatigue       | 1404  | 1682    |
| fatigue       | 12411 | 2832.12 |
| fatigue       | 1900  | 1B32.00 |
| fatigue       | 9127  | 1688    |
| fatigue       | 9220  | Eu46011 |
| fatigue       | 9435  | 1684.11 |
| fatigue       | 4546  | R007200 |
| fatigue       | 1042  | R007400 |
| fatigue       | 44215 | F286000 |
| fatigue       | 17736 | R204.00 |
| fatigue       | 5814  | 1B3..12 |
| fatigue       | 5049  | 168..12 |
| fatigue       | 23932 | F286.13 |
| fatigue       | 29292 | F286100 |
| fatigue       | 5658  | 1683    |
| fatigue       | 9823  | R007411 |
| jaundice      | 5996  | 2274.11 |
| jaundice      | 25418 | 1675    |
| jaundice      | 6000  | 1675.11 |
| jaundice      | 29488 | 2274    |
| jaundice      | 355   | R024.00 |
| jaundice      | 3121  | J66y600 |
| jaundice      | 18574 | R024100 |
| jaundice      | 2612  | R024111 |
| jaundice      | 18019 | 1675.12 |
| lump/mass abd | 34238 | 7H2C500 |
| lump/mass abd | 20387 | 25L..00 |
| lump/mass abd | 21575 | 25J8.00 |
| lump/mass abd | 25588 | 25J1.00 |
| lump/mass abd | 21301 | 25K..00 |
| lump/mass abd | 3015  | R093100 |

|                 |        |         |
|-----------------|--------|---------|
| lump/mass abd   | 1987   | 25Q3.00 |
| lump/mass abd   | 7073   | R093200 |
| lump/mass abd   | 56675  | 25JZ.00 |
| lump/mass abd   | 20827  | 25J7.00 |
| lump/mass abd   | 16370  | R093z00 |
| lump/mass abd   | 8731   | 25J..00 |
| lump/mass abd   | 64153  | 25R3.00 |
| lump/mass abd   | 4800   | R093000 |
| lump/mass abd   | 17246  | 25K4.00 |
| lump/mass abd   | 5838   | R093.00 |
| obstruction     | 18789  | J50zz11 |
| obstruction     | 28322  | J50z400 |
| obstruction     | 1221   | J50zz15 |
| obstruction     | 21648  | J50zz14 |
| obstruction     | 935    | J50z.00 |
| obstruction     | 1544   | J50zz00 |
| obstruction     | 1307   | J50z500 |
| obstruction     | 29118  | J50y000 |
| obstruction     | 1347   | J50zz13 |
| obstruction     | 33759  | J50yz00 |
| obstruction     | 21568  | J50zz12 |
| obstruction     | 20471  | J50..00 |
| obstruction     | 42547  | J50y.00 |
| obstruction     | 23478  | SP14400 |
| obstruction     | 18240  | J50y.11 |
| rectal bleeding | 6151   | 19E6.11 |
| rectal bleeding | 9968   | 19ED.00 |
| rectal bleeding | 32446  | J573100 |
| rectal bleeding | 12471  | J68z.00 |
| rectal bleeding | 1642   | J68z.11 |
| rectal bleeding | 6554   | J573012 |
| rectal bleeding | 5462   | 19E6.00 |
| rectal bleeding | 6574   | J573000 |
| rectal bleeding | 20859  | J681.13 |
| rectal bleeding | 4636   | J68zz00 |
| rectal bleeding | 621    | J573011 |
| rectal bleeding | 45911  | 19EG.00 |
| rectal bleeding | 104124 | 8HTE000 |
| rectal bleeding | 19271  | J573.00 |
| rectal bleeding | 11698  | 196C.00 |
| rectal bleeding | 3053   | 4794    |
| rectal bleeding | 2832   | G848000 |
| rectal bleeding | 27862  | J681.12 |
| rectal bleeding | 3872   | J573.11 |
| rectal bleeding | 2873   | J681.11 |
| rectal bleeding | 11718  | 196B.00 |
| rectal bleeding | 3097   | J68..00 |
| tenesmus        | 38499  | 19D2.00 |
| tenesmus        | 15756  | R07z000 |
| tenesmus        | 6541   | 19D..11 |
| tenesmus        | 14948  | 19D..00 |
| weight loss     | 654    | 1623    |
| weight loss     | 12398  | 1D1A.00 |
| weight loss     | 102563 | 1627    |
| weight loss     | 37937  | 22A8.00 |
| weight loss     | 5812   | 1625.11 |
| weight loss     | 24068  | R2y4.00 |
| weight loss     | 4663   | 1625    |
| weight loss     | 126    | 22A6.00 |
| weight loss     | 12530  | R034800 |

|             |      |         |
|-------------|------|---------|
| weight loss | 3647 | R032.00 |
|-------------|------|---------|

**eAppendix.** Routes to Diagnosis for Included Patients Who Were Symptomatic  
Based on NCIN-PHE)<sup>22</sup>

**Fast-track (or two-week wait) referrals:** Patients referred urgently by their GP for suspected cancer, so that they can see a specialist within 2 weeks (introduced in England in 2000).

**Routine GP referrals:** Patients referred by their GP but not under the two-week wait referral route

**Elective outpatient/inpatient:** An elective route starting with an outpatient appointment, either consultant to consultant referral or other referral; or starting with inpatient admission where no earlier information is available from waiting list prior to admission.

**Emergency cancer diagnosis:** Diagnosis of cancer following presentation to an Accident and Emergency Unit or a GP emergency referral or emergency pathways for in/out-patients.

**eFigure.** Study Variables and Hypothesized Associations Between Mental Health Morbidity and Symptomatic Presentations and Route to Cancer Diagnosis

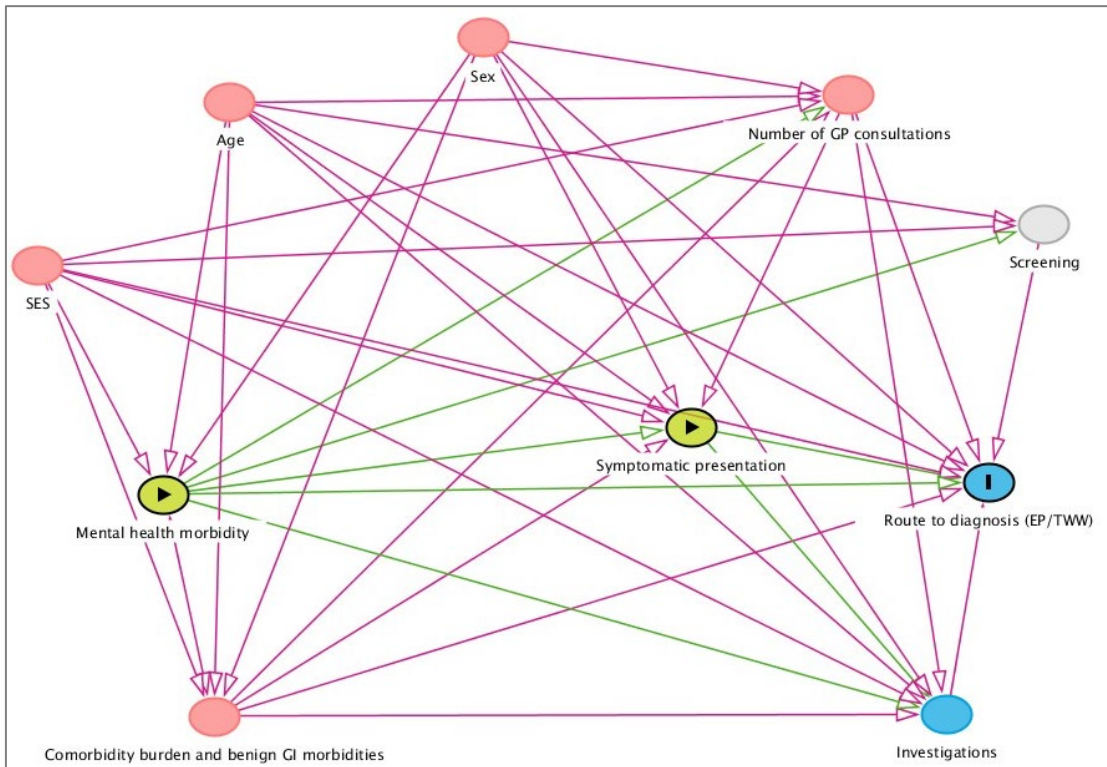

Notes: Investigations are considered as 'ancestor outcomes' (defined as an outcome that is 'upstream' and can be on the causal pathway with respect to the main outcome of interest); potential confounding variables include comorbidity burden, socio-economic status (SES), age, sex, and number of GP consultations for any reason as 'ancestors' of exposures and outcomes. Screening is considered as an 'unobserved ancestor', as the study is focusing on cancer diagnosis in symptomatic patients, rather than screening in non-symptomatic individuals. Purple: biasing paths; Green: causal paths. (Produced with DAGitty v3.0)



| <b>eTable 2. Characteristics of 2115 Patients With Colon Cancer and Red-Flag Symptoms or Signs by Mental Health Morbidity (MHM) Status</b> |                                          |                                    |                                |                     |
|--------------------------------------------------------------------------------------------------------------------------------------------|------------------------------------------|------------------------------------|--------------------------------|---------------------|
|                                                                                                                                            | <b>All patients<br/>N (%) (n = 2115)</b> | <b>No MHM<br/>N (%) (n = 1807)</b> | <b>MHM<br/>N (%) (n = 308)</b> | <b>Chi2 p-value</b> |
| <b>Age group</b>                                                                                                                           |                                          |                                    |                                | 0.097               |
| <45                                                                                                                                        | 37 (1.7)                                 | 33 (1.8)                           | 4 (1.3)                        |                     |
| 45-54                                                                                                                                      | 133 (6.3)                                | 113 (6.3)                          | 20 (6.5)                       |                     |
| 55-64                                                                                                                                      | 299 (14.1)                               | 270 (14.9)                         | 29 (9.4)                       |                     |
| 65-74                                                                                                                                      | 520 (24.6)                               | 447 (24.7)                         | 73 (23.7)                      |                     |
| 75-84                                                                                                                                      | 790 (37.4)                               | 667 (36.9)                         | 123 (39.9)                     |                     |
| 85+                                                                                                                                        | 336 (15.9)                               | 277 (15.3)                         | 59 (19.2)                      |                     |
|                                                                                                                                            |                                          |                                    |                                |                     |
| <b>Sex</b>                                                                                                                                 |                                          |                                    |                                | 0.000               |
| Male                                                                                                                                       | 1,061 (50.2)                             | 941 (52.1)                         | 120 (39.0)                     |                     |
| Female                                                                                                                                     | 1,054 (49.8)                             | 866 (47.9)                         | 188 (61.0)                     |                     |
|                                                                                                                                            |                                          |                                    |                                |                     |
| <b>Deprivation quintile</b>                                                                                                                |                                          |                                    |                                | 0.000               |
| 1 (Least deprived)                                                                                                                         | 550 (26.0)                               | 457 (25.3)                         | 93 (30.2)                      |                     |
| 2                                                                                                                                          | 483 (22.8)                               | 434 (24.0)                         | 49 (15.9)                      |                     |
| 3                                                                                                                                          | 463 (21.9)                               | 407 (22.5)                         | 56 (18.2)                      |                     |
| 4                                                                                                                                          | 366 (17.3)                               | 309 (17.1)                         | 57 (18.5)                      |                     |
| 5 (most deprived)                                                                                                                          | 253 (12.0)                               | 200 (11.1)                         | 53 (17.2)                      |                     |
|                                                                                                                                            |                                          |                                    |                                |                     |
| <b>Charlson Comorbidity Index</b>                                                                                                          |                                          |                                    |                                | 0.000               |
| 0                                                                                                                                          | 1,155 (54.6)                             | 1,035 (57.3)                       | 120 (39.0)                     |                     |
| 1                                                                                                                                          | 470 (22.2)                               | 388 (21.5)                         | 82 (26.6)                      |                     |
| 2                                                                                                                                          | 247 (11.7)                               | 194 (10.7)                         | 53 (17.2)                      |                     |
| 3+                                                                                                                                         | 243 (11.5)                               | 190 (10.5)                         | 53 (17.2)                      |                     |
|                                                                                                                                            |                                          |                                    |                                |                     |
| <b>Irritable Bowel Syndrome / Diverticular Disease</b>                                                                                     |                                          |                                    |                                | 0.162               |
| No                                                                                                                                         | 1,926 (91.1)                             | 1,652 (91.4)                       | 274 (89.0)                     |                     |
| Yes                                                                                                                                        | 189 (8.9)                                | 155 (8.6)                          | 34 (11.0)                      |                     |
|                                                                                                                                            |                                          |                                    |                                |                     |
| <b>Visits to GP in 1-12 months prior cancer diagnosis</b>                                                                                  |                                          |                                    |                                | 0.000               |
| 0                                                                                                                                          | 27 (1.3)                                 | 25 (1.4)                           | 2 (0.6)                        |                     |
| 1-4                                                                                                                                        | 179 (8.5)                                | 174 (9.6)                          | 5 (1.6)                        |                     |
| 5-9                                                                                                                                        | 367 (17.4)                               | 342 (18.9)                         | 25 (8.1)                       |                     |
| 10+                                                                                                                                        | 1,542 (72.9)                             | 1,266 (70.1)                       | 276 (89.6)                     |                     |
|                                                                                                                                            |                                          |                                    |                                |                     |
| <b>Type of symptoms in 24 months prior cancer diagnosis</b>                                                                                |                                          |                                    |                                | 0.434               |
| Rectal bleeding or CIBH                                                                                                                    | 860 (40.7)                               | 741 (41.0)                         | 119 (38.6)                     |                     |
| Anaemia (only red-flag)                                                                                                                    | 1,255 (59.3)                             | 1,066 (59.0)                       | 189 (61.4)                     |                     |
|                                                                                                                                            |                                          |                                    |                                |                     |
| <b>Bowel endoscopy in 24 months prior cancer diagnosis</b>                                                                                 |                                          |                                    |                                | 0.083               |
| No                                                                                                                                         | 508 (24.0)                               | 422 (23.4)                         | 86 (27.9)                      |                     |
| Yes                                                                                                                                        | 1,607 (76.0)                             | 1,385 (76.6)                       | 222 (72.1)                     |                     |
|                                                                                                                                            |                                          |                                    |                                |                     |
| <b>Route to diagnosis</b>                                                                                                                  |                                          |                                    |                                | 0.000               |
| Emergency presentation                                                                                                                     | 417 (19.7)                               | 327 (18.1)                         | 90 (29.2)                      |                     |
| Two-week wait                                                                                                                              | 859 (40.6)                               | 765 (42.3)                         | 94 (30.5)                      |                     |
| GP referral                                                                                                                                | 541 (25.6)                               | 450 (24.9)                         | 91 (29.5)                      |                     |
| Screening                                                                                                                                  | 63 (3.0)                                 | 63 (3.5)                           | 0 (0.0)                        |                     |
| Inpatient elective                                                                                                                         | 76 (3.6)                                 | 68 (3.8)                           | 8 (2.6)                        |                     |
| Other outpatient                                                                                                                           | 159 (7.5)                                | 134 (7.4)                          | 25 (8.1)                       |                     |

**eTable 3.** Patients at Risk for Diagnosis and Investigation by Mental Health Morbidity (MHM) per Time Point Before Cancer Diagnosis

These numbers at risk refer to patients included in each panel in Figure 2.

|          | All symptomatic patients |              |         |              | Patients with red-flag symptoms |              |         |              |
|----------|--------------------------|--------------|---------|--------------|---------------------------------|--------------|---------|--------------|
|          | No MHM                   |              | MHM     |              | No MHM                          |              | MHM     |              |
|          | At Risk                  | Diagnosed    | At Risk | Diagnosed    | At Risk                         | Diagnosed    | At Risk | Diagnosed    |
| Baseline | 3143                     |              | 623     | 0            | 1807                            | 0            | 308     | 0            |
| 180 days | 1583                     | 1560         | 401     | 222          | 814                             | 993          | 186     | 122          |
| 365 days | 1080                     | 503          | 301     | 100          | 519                             | 295          | 139     | 47           |
| 545 days | 637                      | 443          | 186     | 115          | 282                             | 237          | 80      | 59           |
| 730 days | 0                        | 637          | 0       | 186          | 0                               | 282          | 0       | 80           |
|          | At Risk                  | Investigated | At Risk | Investigated | At Risk                         | Investigated | At Risk | Investigated |
| Baseline | 2336                     | 0            | 439     | 0            | 1485                            | 0            | 245     | 0            |
| 180 days | 937                      | 1399         | 217     | 222          | 502                             | 983          | 111     | 134          |
| 365 days | 595                      | 342          | 146     | 71           | 299                             | 203          | 76      | 35           |
| 545 days | 310                      | 285          | 74      | 72           | 149                             | 150          | 41      | 35           |
| 730 days | 0                        | 310          | 0       | 74           | 0                               | 149          | 0       | 41           |

| <b>eTable 4. Likelihood of Being Diagnosed After Emergency Presentation (EP) in 2115 Patients With Red-Flag Symptoms</b> |                          |               |         |             |         |
|--------------------------------------------------------------------------------------------------------------------------|--------------------------|---------------|---------|-------------|---------|
|                                                                                                                          | % diagnosed following EP | Unadjusted OR |         | Adjusted OR |         |
|                                                                                                                          |                          | OR            | 95% CI  | OR          | 95% CI  |
| <b>Mental Health Morbidity</b>                                                                                           |                          |               |         |             |         |
| No                                                                                                                       | 327 (18.1)               |               |         |             |         |
| Yes                                                                                                                      | 90 (29.2)                | 1.9           | 1.4,2.4 | 1.6         | 1.2,2.2 |
| <b>Age group</b>                                                                                                         |                          |               |         |             |         |
| <45                                                                                                                      | 5 (13.5)                 | 0.9           | 0.3,2.2 | 0.9         | 0.3,2.4 |
| 45-54                                                                                                                    | 21 (15.8)                | 1.1           | 0.6,1.8 | 1.0         | 0.6,1.7 |
| 55-64                                                                                                                    | 45 (15.1)                |               |         |             |         |
| 65-74                                                                                                                    | 69 (13.3)                | 0.9           | 0.6,1.3 | 0.7         | 0.5,1.1 |
| 75-84                                                                                                                    | 158 (20.0)               | 1.4           | 1.0,2.0 | 1.0         | 0.7,1.5 |
| 85+                                                                                                                      | 119 (35.4)               | 3.1           | 2.2,4.4 | 2.2         | 1.5,3.3 |
| <b>Sex</b>                                                                                                               |                          |               |         |             |         |
| Male                                                                                                                     | 186 (17.5)               |               |         |             |         |
| Female                                                                                                                   | 231 (21.9)               | 1.1           | 0.6,1.8 | 1.0         | 0.6,1.7 |
| <b>Deprivation quintile</b>                                                                                              |                          |               |         |             |         |
| 1                                                                                                                        | 94 (17.1)                |               |         |             |         |
| 2                                                                                                                        | 95 (19.7)                | 1.2           | 0.9,1.6 | 1.3         | 0.9,1.8 |
| 3                                                                                                                        | 81 (17.5)                | 1.0           | 0.8,1.4 | 1.1         | 0.8,1.5 |
| 4                                                                                                                        | 76 (20.8)                | 1.3           | 0.9,1.8 | 1.3         | 0.9,1.9 |
| 5                                                                                                                        | 71 (28.1)                | 1.9           | 1.3,2.7 | 1.8         | 1.3,2.7 |
| <b>CCI score</b>                                                                                                         |                          |               |         |             |         |
| 0                                                                                                                        | 148 (12.8)               |               |         |             |         |
| 1                                                                                                                        | 117 (24.9)               | 2.3           | 1.7,2.9 | 2.1         | 1.6,2.8 |
| 2                                                                                                                        | 53 (21.5)                | 1.9           | 1.3,2.6 | 1.6         | 1.1,2.4 |
| 3+                                                                                                                       | 99 (40.7)                | 4.7           | 3.4,6.4 | 4.0         | 2.8,5.6 |
| <b>Irritable Bowel Syndrome / Diverticular Disease</b>                                                                   |                          |               |         |             |         |
| No                                                                                                                       | 371 (19.3)               |               |         |             |         |
| Yes                                                                                                                      | 46 (24.3)                | 1.3           | 1.0,1.9 | 1.3         | 0.9,1.8 |
| <b>Visits to GP in 1-12 months prior cancer diagnosis</b>                                                                |                          |               |         |             |         |
| 0                                                                                                                        | 8 (29.6)                 | 1.6           | 0.7,3.6 | 1.8         | 0.7,4.7 |
| 1-4                                                                                                                      | 34 (19.0)                | 0.9           | 0.6,1.3 | 1.9         | 1.2,3.2 |
| 5-9                                                                                                                      | 49 (13.4)                | 0.6           | 0.4,0.8 | 1.0         | 0.7,1.4 |
| 10+                                                                                                                      | 326 (21.1)               |               |         |             |         |
| <b>Type of symptoms in 24 months prior cancer diagnosis</b>                                                              |                          |               |         |             |         |
| Rectal bleeding or CIBH                                                                                                  | 118 (13.7)               |               |         |             |         |
| Anaemia (only red-flag)                                                                                                  | 299 (23.8)               | 2.0           | 1.6,2.5 | 1.9         | 1.5,2.4 |

Logistic regression Odds Ratios (OR) and 95% Confidence Intervals (95%CI)

| <b>eTable 5. Likelihood of Being Diagnosed After Expedited Referral in Patients Aged 60 y and Older With Red-Flag Symptoms</b> |                           |               |         |             |         |
|--------------------------------------------------------------------------------------------------------------------------------|---------------------------|---------------|---------|-------------|---------|
|                                                                                                                                | % diagnosed following TWW | Unadjusted OR |         | Adjusted OR |         |
|                                                                                                                                |                           | OR            | 95% CI  | OR          | 95% CI  |
| <b>Mental Health Morbidity</b>                                                                                                 |                           |               |         |             |         |
| No                                                                                                                             | 650 (42.4)                |               |         |             |         |
| Yes                                                                                                                            | 76 (27.9)                 | 0.5           | 0.4,0.7 | 0.6         | 0.5,0.8 |
| <b>Age group</b>                                                                                                               |                           |               |         |             |         |
| 55-64                                                                                                                          | 72 (45.3)                 |               |         |             |         |
| 65-74                                                                                                                          | 217 (41.7)                | 0.9           | 0.6,1.3 | 1.0         | 0.7,1.6 |
| 75-84                                                                                                                          | 333 (42.2)                | 0.9           | 0.6,1.3 | 1.2         | 0.8,1.8 |
| 85+                                                                                                                            | 104 (31.0)                | 0.5           | 0.4,0.8 | 0.8         | 0.5,1.2 |
| <b>Sex</b>                                                                                                                     |                           |               |         |             |         |
| Male                                                                                                                           | 368 (41.2)                |               |         |             |         |
| Female                                                                                                                         | 358 (39.3)                | 0.9           | 0.8,1.1 | 1.0         | 0.8,1.2 |
| <b>Deprivation quintile</b>                                                                                                    |                           |               |         |             |         |
| 1                                                                                                                              | 193 (41.5)                |               |         |             |         |
| 2                                                                                                                              | 162 (38.8)                | 0.9           | 0.7,1.2 | 0.8         | 0.6,1.1 |
| 3                                                                                                                              | 190 (48.6)                | 1.3           | 1.0,1.7 | 1.3         | 1.0,1.7 |
| 4                                                                                                                              | 111 (35.5)                | 0.8           | 0.6,1.0 | 0.8         | 0.6,1.0 |
| 5                                                                                                                              | 70 (32.0)                 | 0.7           | 0.5,0.9 | 0.7         | 0.5,1.0 |
| <b>CCI score</b>                                                                                                               |                           |               |         |             |         |
| 0                                                                                                                              | 423 (46.1)                |               |         |             |         |
| 1                                                                                                                              | 168 (40.1)                | 0.8           | 0.6,1.0 | 0.9         | 0.7,1.2 |
| 2                                                                                                                              | 81 (34.2)                 | 0.6           | 0.4,0.8 | 0.8         | 0.5,1.1 |
| 3+                                                                                                                             | 54 (23.3)                 | 0.4           | 0.3,0.5 | 0.5         | 0.3,0.7 |
| <b>Irritable Bowel Syndrome / Diverticular Disease</b>                                                                         |                           |               |         |             |         |
| No                                                                                                                             | 683 (41.7)                |               |         |             |         |
| Yes                                                                                                                            | 43 (25.4)                 | 0.5           | 0.3,0.7 | 0.5         | 0.3,0.7 |
| <b>Visits to GP in 1-12 months prior cancer diagnosis</b>                                                                      |                           |               |         |             |         |
| 0                                                                                                                              | 6 (30.0)                  | 0.8           | 0.3,2.0 | 0.8         | 0.3,2.2 |
| 1-4                                                                                                                            | 68 (57.6)                 | 2.4           | 1.6,3.5 | 1.8         | 1.2,2.7 |
| 5-9                                                                                                                            | 149 (53.6)                | 2.0           | 1.6,2.6 | 1.6         | 1.2,2.1 |
| 10+                                                                                                                            | 503 (36.2)                |               |         |             |         |
| <b>Type of symptoms in 24 months prior cancer diagnosis</b>                                                                    |                           |               |         |             |         |
| Rectal bleeding or CIBH                                                                                                        | 310 (43.9)                |               |         |             |         |
| Anaemia (only red-flag)                                                                                                        | 416 (37.9)                | 0.8           | 0.6,1.0 | 0.8         | 0.7,1.0 |

Logistic regression Odds Ratios (OR) and 95% Confidence Intervals (95%CI)

| <b>eTable 6. Likelihood of Being Diagnosed After Emergency Presentation Among Patients With Colon Cancer Who Were Symptomatic</b> |                           |               |         |             |         |
|-----------------------------------------------------------------------------------------------------------------------------------|---------------------------|---------------|---------|-------------|---------|
|                                                                                                                                   | Emergency diagnosis n (%) | Unadjusted OR |         | Adjusted OR |         |
|                                                                                                                                   |                           | OR            | 95% CI  | OR          | 95% CI  |
| <b>Mental Health Morbidity</b>                                                                                                    |                           |               |         |             |         |
| No                                                                                                                                | 859 (27.3)                |               |         |             |         |
| Yes                                                                                                                               | 231 (37.1)                | 1.6           | 1.3,1.9 | 1.4         | 1.2,1.7 |
| <b>Age group</b>                                                                                                                  |                           |               |         |             |         |
| <45                                                                                                                               | 30 (35.3)                 | 1.7           | 1.1,2.6 | 1.5         | 0.9,2.5 |
| 45-54                                                                                                                             | 71 (28.0)                 | 1.2           | 0.9,1.6 | 1.1         | 0.8,1.5 |
| 55-64                                                                                                                             | 133 (24.7)                |               |         |             |         |
| 65-74                                                                                                                             | 220 (23.4)                | 0.9           | 0.7,1.2 | 0.9         | 0.7,1.2 |
| 75-84                                                                                                                             | 369 (28.0)                | 1.2           | 0.9,1.5 | 1.2         | 0.9,1.5 |
| 85+                                                                                                                               | 267 (42.4)                | 2.2           | 1.8,2.9 | 2.1         | 1.6,2.8 |
| <b>Sex</b>                                                                                                                        |                           |               |         |             |         |
| Male                                                                                                                              | 501 (27.0)                |               |         |             |         |
| Female                                                                                                                            | 589 (30.8)                | 1.2           | 0.9,1.6 | 1.1         | 0.8,1.5 |
| <b>Deprivation quintile</b>                                                                                                       |                           |               |         |             |         |
| 1                                                                                                                                 | 260 (27.5)                |               |         |             |         |
| 2                                                                                                                                 | 250 (28.7)                | 1.1           | 0.9,1.3 | 1.1         | 0.9,1.3 |
| 3                                                                                                                                 | 210 (26.1)                | 0.9           | 0.8,1.1 | 1.0         | 0.8,1.2 |
| 4                                                                                                                                 | 193 (29.4)                | 1.1           | 0.9,1.3 | 1.0         | 0.8,1.3 |
| 5                                                                                                                                 | 177 (36.3)                | 1.5           | 1.2,1.9 | 1.4         | 1.1,1.8 |
| <b>CCI score</b>                                                                                                                  |                           |               |         |             |         |
| 0                                                                                                                                 | 429 (21.9)                |               |         |             |         |
| 1                                                                                                                                 | 295 (33.7)                | 1.8           | 1.5,2.2 | 2.0         | 1.6,2.4 |
| 2                                                                                                                                 | 127 (30.4)                | 1.6           | 1.2,1.9 | 1.8         | 1.4,2.3 |
| 3+                                                                                                                                | 239 (46.3)                | 3.1           | 2.5,3.8 | 3.4         | 2.6,4.3 |
| <b>Irritable Bowel Syndrome / Diverticular Disease</b>                                                                            |                           |               |         |             |         |
| No                                                                                                                                | 983 (28.6)                |               |         |             |         |
| Yes                                                                                                                               | 107 (32.0)                | 1.2           | 0.9,1.5 | 1.2         | 0.9,1.5 |
| <b>Visits to GP in 1-12 months pre-cancer diagnosis</b>                                                                           |                           |               |         |             |         |
| 0                                                                                                                                 | 35 (39.3)                 | 1.7           | 1.1,2.6 | 1.5         | 0.9,2.5 |
| 1-4                                                                                                                               | 119 (36.3)                | 1.5           | 1.1,1.9 | 2.5         | 1.9,3.4 |
| 5-9                                                                                                                               | 186 (28.1)                | 1.0           | 0.8,1.2 | 1.5         | 1.2,1.8 |
| 10+                                                                                                                               | 750 (27.9)                |               |         |             |         |
| <b>Symptoms in 24 months pre-cancer diagnosis</b>                                                                                 |                           |               |         |             |         |
| Rectal bleeding or CIBH                                                                                                           | 118 (13.7)                |               |         |             |         |
| Anaemia (only red-flag)                                                                                                           | 299 (23.8)                | 2.0           | 1.6,2.5 | 1.9         | 1.5,2.4 |
| Non red-flag only                                                                                                                 | 538 (44.1)                | 5.0           | 4.0,6.2 | 5.0         | 4.0,6.3 |
| Chronic only                                                                                                                      | 135 (31.3)                | 2.9           | 2.2,3.8 | 2.1         | 1.6,2.8 |
